# Supplementary material for: Defective TiO x spontaneously triggers the hydrogenation activity of silver
Source: Royal Society of Chemistry journal article supplement (doi:10.1039/d5cc06528c), 2026-01-01
Supplement: d5cc06528c1.pdf [file d5cc06528c1.pdf]

Electronic Supplementary Information (ESI)

**Defective TiO<sub>x</sub> spontaneously triggers the hydrogenation activity of silver**

Xinping Duan,<sup>\*a</sup> Wei Zhao,<sup>a</sup> Zuo-Chang Chen,<sup>a</sup> Jianwei Zheng,<sup>a</sup> Haiqiang Lin,<sup>a</sup> Linmin Ye,<sup>a</sup> and Youzhu Yuan <sup>\*a</sup>

<sup>a</sup> State Key Laboratory of Physical Chemistry of Solid Surfaces, National Engineering Laboratory for Green Chemical Productions of Alcohols-Ethers-Esters, and Innovation Laboratory for Sciences and Technologies of Energy Materials of Fujian Province (IKKEM), College of Chemistry and Chemical Engineering, Xiamen University, Xiamen 361005, China.

E-mail: yzyuan@xmu.edu.cn; xpduan@xmu.edu.cn

## General experimental methods

Chloroauric acid ( $\text{HAuCl}_4 \cdot 4\text{H}_2\text{O}$ ), silver nitrate ( $\text{AgNO}_3$ ), copper nitrate ( $\text{Cu}(\text{NO}_3)_2 \cdot 6\text{H}_2\text{O}$ ), chloroplatinic acid ( $\text{H}_2\text{PtCl}_6 \cdot 6\text{H}_2\text{O}$ ), and similar reagents were of analytical grade and were obtained from the Alfa Aesar Co. (99.9% purity). The  $\text{TiO}_2$  supports used here are anatase phase ( $\text{TiO}_2$  (A)), P25 and rutile phase ( $\text{TiO}_2$  (R)) respectively.  $\text{TiO}_2$  (A) (99.8% purity) and  $\text{TiO}_2$  (R) (99.8% purity) were purchased from Aladdin industrial corporation. P25 contains both anatase and rutile phase and was purchased from Degussa Co.

## Materials and synthetic procedures.

Remarkably increasing the electrical conductivity and the density of oxygen vacancies (donor density) of  $\text{TiO}_2$  will be engineer under reducing conditions in a reducing reagent.  $\text{NaBH}_4$ -treatment protocol, wherein a commonly used reducing component was selected on account of its high ability of reduction potential for transferring  $\text{Ti}(\text{IV})$  to  $\text{Ti}(\text{III})$ , have been proposed for constructing oxygen vacancies in metal oxides.<sup>1, 2</sup> The reaction mechanism is as follows:

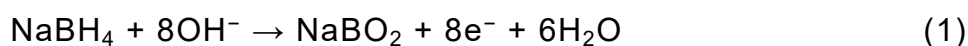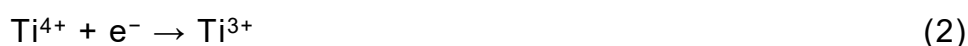

Defective  $\text{TiO}_2$  (anatase) was made as following processes. In detail, 1.0 g of the  $\text{TiO}_2$  was mixed with varying contents of  $\text{NaBH}_4$  to generate varied oxygen vacancies in  $\text{TiO}_2$  under nitrogen ( $\text{N}_2$ ) protection. After thoroughly grinding for 30 min, the mixtures were calcined at  $350^\circ\text{C}$  for 2 h with flowing  $\text{N}_2$  atmosphere at a heating rate of  $10^\circ\text{C min}^{-1}$ . After cooling naturally to room temperature. Then the resultant solid was washed with deionized water three times to remove sodium cations, boron involved oxides and/or unreacted  $\text{NaBH}_4$ . The rutile  $\text{TiO}_2$  and anatase-rutile mixed titanium oxide combined with oxygen vacancies were also made via the same methods above. The defective  $\text{TiO}_2$  with abundant oxygen vacancies was manufactured (referred to  $\text{O}_v\text{-TiO}_2$ ).<sup>1, 2</sup> The impurities on the  $\text{TiO}_2$  surface were determined by elemental analysis (Inductively Coupled Plasma, ICP) and X-ray photoelectron spectroscopy (XPS).<sup>3, 4</sup>

Pristine and defective  $\text{TiO}_2$  ( $\text{TiO}_2$  and  $\text{O}_\text{v}\text{-TiO}_2$ ) supported monometallic coinage metal-based catalysts with a presetting coinage metal loadings (silver, copper and gold loading of 10 wt.%, 10 wt.% and 1 wt.%, respectively) were synthesized using a conventional co-impregnation method. Specifically, taking silver-based catalyst as a instance, certain amount of  $\text{AgNO}_3$  was dissolved in deionized water to form a transparent solution.  $\text{TiO}_2$  or  $\text{O}_\text{v}\text{-TiO}_2$  solid then was introduced into the above solution. The mixture was vigorously stirred and then aged at room temperature overnight in darkneess. The obtained sample was subsequently dried at 100 °C for 12 h, calcined at 350 °C for 4 h under  $\text{N}_2$  atmosphere flow. Further, the obtained sample was divided into two parts for the undergoing catalytic assessing. It is noteworthy that the obtained  $\text{Ag-O}_\text{v}\text{-TiO}_2$  were directly carried out on the exploration of the oxygen vacancies strightly activating silver (other coinage metals) for the selective C–O bond activation and hydrogenolysis process in dimethyl oxalate hydrogenation. On the other aspect, as a contrast,  $\text{Ag-O}_\text{v}\text{-TiO}_2$  catalyst was further reduced in 5% $\text{H}_2$ -95% $\text{N}_2$  atmosphere at 350 °C for 3 h to produce another form silver-based catalyst (donated as  $\text{Ag-O}_\text{v}\text{-TiO}_2$ ). Meanwhile, pristine  $\text{TiO}_2$  supported silver (other coinage metals, such as gold and copper) catalysts before ( $\text{Ag-TiO}_2$ ) and after ( $\text{Ag-TiO}_2\text{-r}$ ) reduction were investigated for selective C–O bond hydrogenation following the above reduction processes.

The Ag, Cu or Au loadings of the samples were determined by inductively coupled plasma optical emission spectrometer (ICP-OES) using a Thermo Elemental IRIS Intrepid II XSP. The sample was treated by aqua regia at 350 °C for 0.5 h, and the resultant solution was heated until it evaporated. The residue was diluted with 5% HCl and filtrated to a 25 mL volumetric flask before ICP-OES measurement.

### **Characterization methods.**

*The  $\text{N}_2$  adsorption–desorption isotherms* were measured at 77 K using a Micromeritics TriStar II 3020 porosimetry analyzer. The samples were degassed at 573 K for 3 h prior to measurements. The specific surface area ( $S_\text{BET}$ ) was calculated using the Brunauer–Emmett–Teller (BET) method, in

which the isotherm data in a relative pressure ( $P/P_0$ ) range of 0.05 to 0.30 were adopted. The total pore volume ( $V_{\text{pore}}$ ) was derived from the absorbed  $\text{N}_2$  volume at a relative pressure of approximately 0.99.

*Powder X-ray diffraction (XRD)* patterns for the catalyst samples were obtained on a PANalytical X'pert Pro diffractometer using  $\text{Cu-K}\alpha$  radiation ( $\lambda = 0.15418 \text{ nm}$ ) with scanning angle ( $2\theta$ ) ranging from  $10^\circ$  to  $90^\circ$ . The tube voltage was 40 kV, and the current was 30 mA. Each XRD pattern was identified by matching the results with reference patterns that were included in the JCPDS data base.

*Transmission electron microscopy (TEM)* images were obtained on a Tecnai F30 TEM operated at an acceleration voltage of 300 kV. Elemental distribution in the catalysts was determined by energy-dispersive X-ray spectroscopy (EDX) at scanning TEM (STEM) mode. The powdered catalyst was ultrasonically dispersed in ethanol at room temperature for 30 min. The as-obtained solution was then dropped into carbon-coated copper grids.

*Hydrogen-temperature-programmed reduction ( $\text{H}_2$ -TPR)* for the calcined catalyst samples and temperature-programmed desorption (TPD) for adsorbed on the as-reduced samples were carried out on a Micromeritics Autochem II 2920 instrument connected to a Hiden Qic-20 mass spectrometer (MS). For TPR tests, 100 mg of the sample was loaded into a quartz U-tube and dried in an argon stream at  $100^\circ\text{C}$  for 1 h to drive off physically adsorbed impurities. After cooling the catalysts to room temperature under an argon atmosphere, 5%  $\text{H}_2$ -95%  $\text{N}_2$  was introduced at a rate of  $50 \text{ mL min}^{-1}$ . The temperature was then ramped linearly from the ambient temperature to  $800^\circ\text{C}$  at a rate of  $10^\circ\text{C min}^{-1}$ . Hydrogen consumption was simultaneously monitored using a thermal conductivity detector (TCD) and MS. For TPD tests, a beaker with 30 mL of methyl acetate and the as-reduced samples were loaded on the bottom of a glass container connected to a vacuum pump. Residual air was removed through a vacuum pump, and the as-reduced samples stayed in the methyl acetate vapor at room temperature overnight. After adsorption, the sample was loaded into a quartz U-tube, and the system was purged with high purity He for 20 min. The TPD test was conducted in flowing He ( $50 \text{ mL min}^{-1}$ ) with a ramping

rate of 10 °C min<sup>-1</sup>. The effluent for each test was analyzed using an online mass spectrometer.

*Ultraviolet–visible light (UV–vis) diffuse reflectance spectroscopy (DRS)* of the as-reduced catalysts was collected on a UV–vis–NIR Cary 5000 scanning spectrophotometer. All catalyst precursors were freshly reduced in 5% H<sub>2</sub>–95% N<sub>2</sub> atmosphere at 693 K for 3 h. The as-reduced samples were carefully protected under a nitrogen atmosphere at room temperature prior to UV–vis DRS measurements.

*X-ray photoelectron spectroscopy (XPS)* was performed using a JPS-9010MC photoelectron spectrometer equipped with an Al–K<sub>α</sub> X-ray radiation source ( $h\nu = 1486.6$  eV). Prior to the measurements, each sample was pressed into a thin disk and pretreated in an atmosphere of 5% H<sub>2</sub>–95% N<sub>2</sub> at 693 K for 3 h. The pretreated samples were carefully collected under nitrogen atmosphere prior to XPS measurements. The binding energy (BE) was calibrated using C 1s peak at 284.6 eV as reference with an uncertainty of  $\pm 0.2$  eV.

X-ray absorption fine structure (XAFS) of Ag K-edge XAFS spectra were recorded in transmission mode at room temperature, using the BL14W1 XAFS beam line at the Shanghai Synchrotron Radiation Facility. The XANES and EXAFS data reduction and analysis were performed using the Athena program that is part of the IFFEFIT software package. The filtered  $k^2$  weighted  $\chi(k)$  was Fourier-transformed into R space ( $k$  range: 2.9–14.3 Å<sup>-1</sup> for Ag-K EXAFS).

*The Fourier-transform infrared (FT-IR)* spectra of catalyst precursors and chemisorbed CO species on pre-reduced catalysts were collected on a Nicolet 6700 spectrometer at 4 cm<sup>-1</sup> resolutions. In a typical procedure, 40 mg of dried catalyst was compressed into a self-supporting wafer and carefully loaded into the *in situ* cell, which was connected to a vacuum-adsorption apparatus with a residual pressure of below 10<sup>-4</sup> Pa. The catalyst wafer was reduced under a flow of H<sub>2</sub> (50 mL min<sup>-1</sup>) at 420 °C for 3 h and then evacuated for 30 min to completely remove the chemisorbed hydrogen species at the same temperature. The catalyst wafer was exposed to high-purity CO (760 Torr) for 10 min and then evacuated after cooling to 30 °C. IR spectra were collected after evacuating for 30 min and referenced to the background spectrum on

catalyst reduced at 420 prior to CO soaking under high vacuum at the same temperature.

Additionally, diffuse reflectance infrared Fourier transform spectroscopy (DRIFTS) were collected to illustrate the intrinsic interaction of C–O bound to various active sites. Specifically, in situ DRIFTS spectra were recorded on Bruker Equinox 70 spectrometer equipped with MCT/A detector and operated at a resolution of  $4\text{ cm}^{-1}$ . Before CO adsorption, the samples were pretreated with He at  $120\text{ }^{\circ}\text{C}$  for 1 h and then cooled to room temperature. The background spectrum was collected in flowing He and then the gas (3 vol% CO/He) was introduced into the reaction cell at a total flow rate of  $33.3\text{ mL min}^{-1}$ . The spectra were recorded until the peak intensity was steady. The blank test was carried out following the exactly same procedure just without catalyst.

The actual contents of Ag loading were determined by X-ray fluorescence (XRF) spectroscopy. Catalyst powders were compressed into a self-supporting wafer prior to analysis, using a PANalytical AXIOS PW4400 sequential spectrophotometer with an Rh tube as radiation source. Measurements were performed with pressed pellets containing 6 wt.% wax.

## **Catalytic test**

The catalytic performance for vapor-phase DMO hydrogenation was evaluated using a stainless steel fixed-bed tubular reactor equipped with a computer-controlled auto-sampling system <sup>5</sup>. Typically, 150 mg of the catalyst precursor (40-mesh to 60-mesh) was loaded into the center of the reactor, with the top side of the catalyst bed packed with quartz powder (40- to 60-mesh). Prior to catalytic performance evaluation, the catalyst was activated under a 5%  $\text{H}_2$ –95%  $\text{N}_2$  flow at 693 K for 3 h. Then, the catalyst bed was cooled to the target reaction temperature, and pure  $\text{H}_2$  was allowed to pass through the catalyst bed. A 10 wt.% DMO methanol solution was then pumped into the reactor using a Series III digital HPLC pump (Scientific Systems, Inc.) with a system pressure of 3.0 MPa. The outlet stream was sampled using an automatic Valco 6-port valve system and analyzed using an online gas chromatograph (Agilent 7890A) equipped with flame ionization and a KB-Wax capillary column ( $30\text{ m}\times 0.45\text{ mm}\times 0.85\text{ }\mu\text{m}$ ) at intervals of 30 min.

The initial turnover frequency (TOF) of the reaction was measured when the DMO conversion was lower than 25%. TOF value was based on Ag or Ni dispersion obtained from XRD and TEM analyses, as well as the number of surface metal atoms according to an equation in the literature<sup>6</sup>. The value was calculated according to the following equation:

$$\text{TOF} = (V \times C_{\text{DMO}} \times X_{\text{DMO}})/(D \times N_M) \quad (3)$$

where  $V$  is the flow rate of the DMO methanol solution,  $C_{\text{DMO}}$  is the DMO concentration in the DMO methanol solution,  $X_{\text{DMO}}$  is the measured DMO conversion measured,  $D$  is the Ag or Ni dispersion, and  $N_M$  is the total amount of Ag or Ni. TOF indicated the moles of DMO converted per hour by each mole of the metal on the catalyst surface ( $\text{mol}_{\text{DMO}} \text{mol}_{\text{metal (surf)}}^{-1} \text{h}^{-1}$  or simply  $\text{h}^{-1}$ ).

The long-term performance of the bimetallic Ag-based catalyst was conducted under standard conditions of 3.0 MPa, 473 K,  $\text{H}_2/\text{DMO} = 80$  (molar ratio), and  $0.6 \text{ g g}_{\text{cat}}^{-1} \text{ h}^{-1}$  weight liquid hourly space velocity (WLHSV) of DMO.

## Supplemental Figures and Table

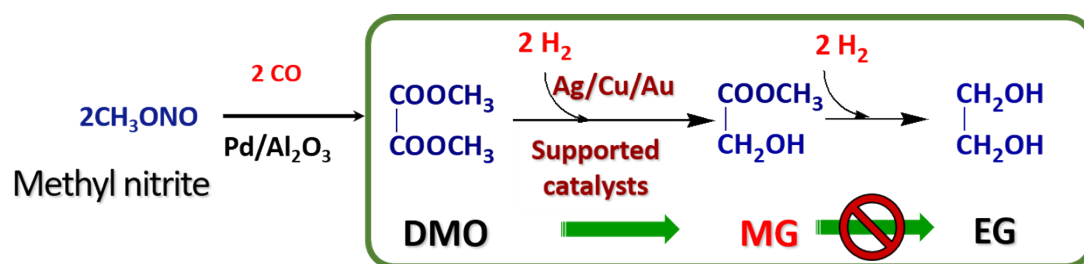

**Scheme S1** Selective C–O bonds hydrogenolysis during tandem reaction over coinage metal-based catalysts.



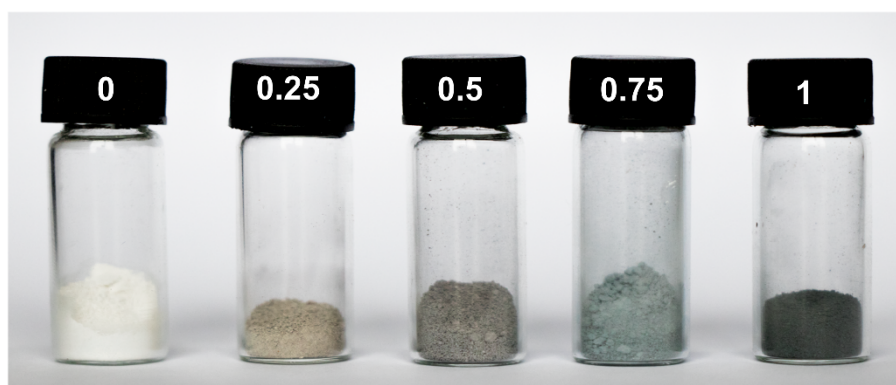

**Fig. S1** Photos of  $\text{TiO}_2$  and  $\text{NaBH}_4$ -treated  $\text{TiO}_2$  nanocrystals as a function of weight ratio of  $\text{NaBH}_4/\text{TiO}_2$ .

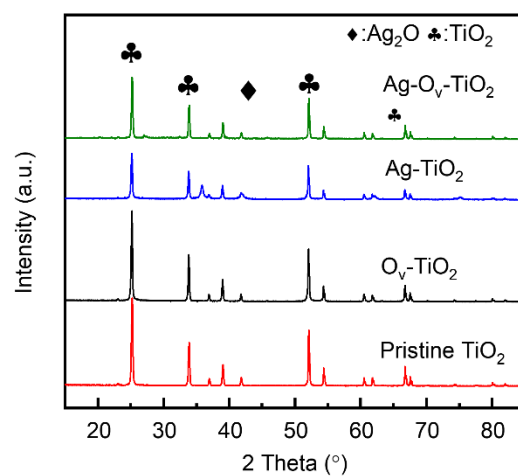

**Fig. S2** XRD patterns of nanostructured anatase  $\text{TiO}_2$  in the absence and presence of defective  $\text{TiO}_x$  overlayer, accompanied with relevant Ag-based catalysts,  $\text{Ag-TiO}_2$  and  $\text{Ag-O}_v\text{-TiO}_2$ , respectively.

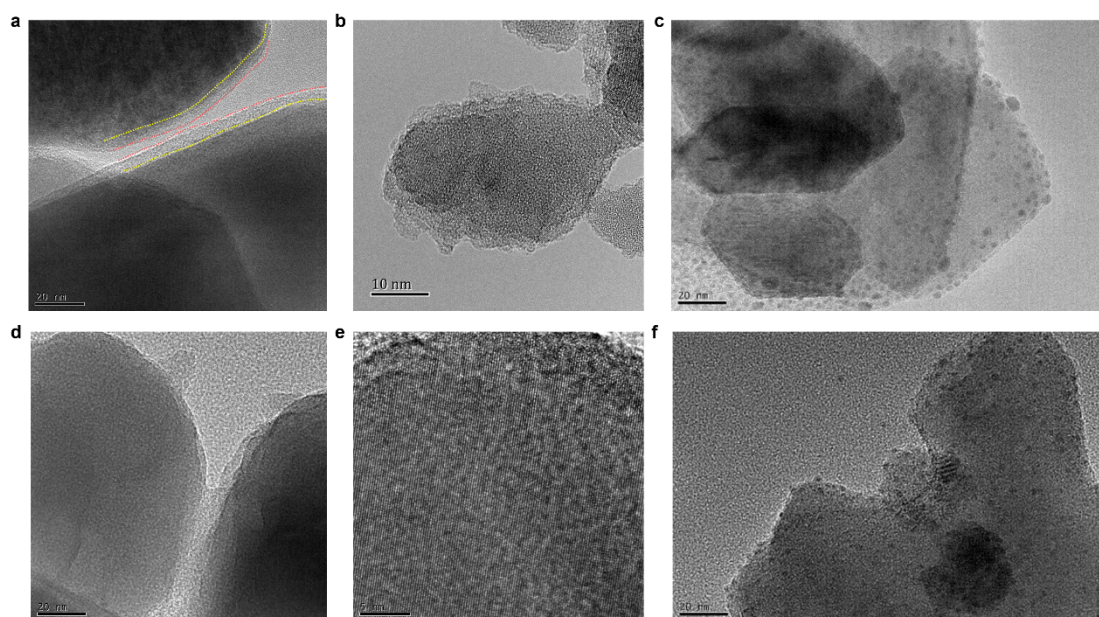

**Fig. S3** HRTEM images of  $O_v\text{-TiO}_2$  (a and b) and  $\text{TiO}_2$  (d and e), associated with  $\text{Ag-}O_v\text{-TiO}_2$  (c) and  $\text{Ag-TiO}_2$  (f) catalysts.

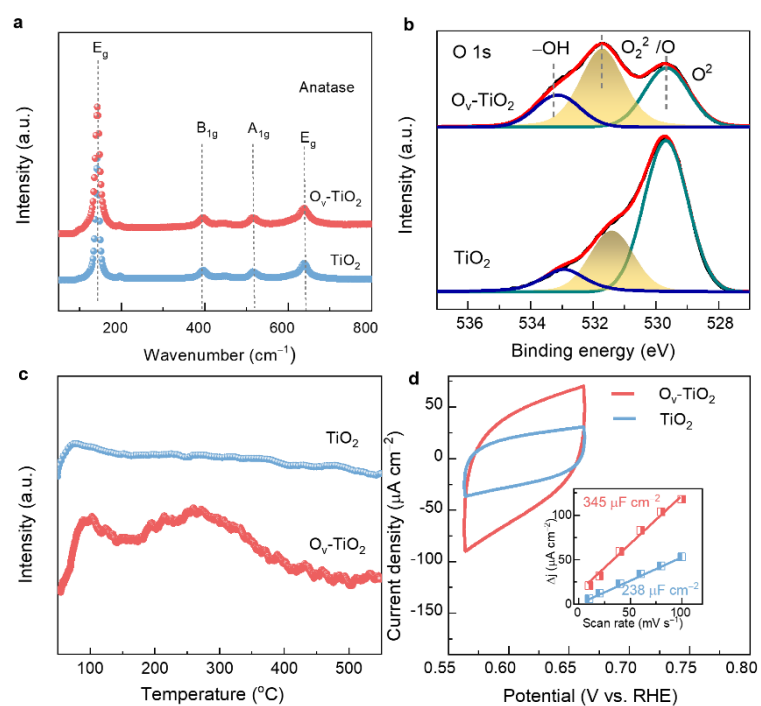

**Fig. S4** Raman spectra (a), XPS spectra of identification of O 1s (b),  $\text{O}_2$ -TPD profiles (c), and CV curves of  $\text{TiO}_2$  and  $\text{O}_v\text{-TiO}_2$  nanocomposites (d), respectively.

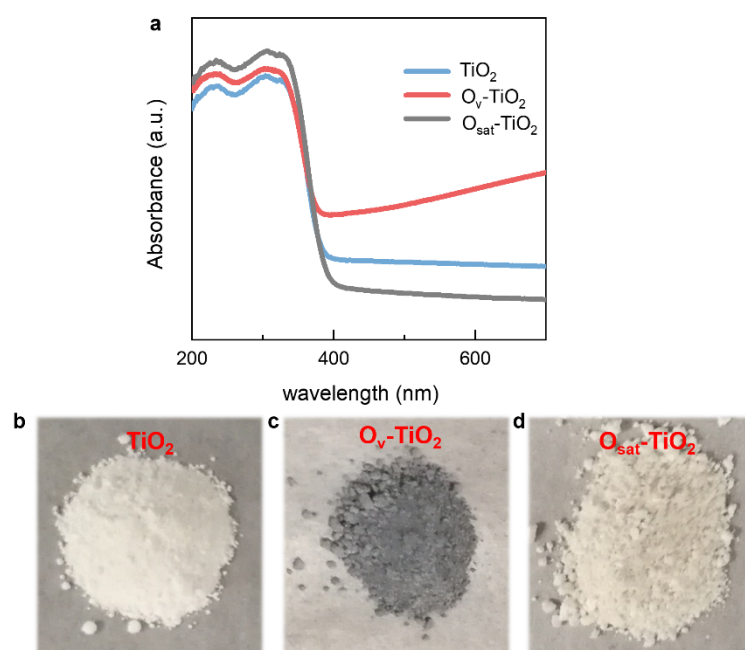

**Fig. S5** UV-vis spectra (a) of  $\text{TiO}_2$ ,  $\text{O}_v\text{-TiO}_2$ , and oxidized  $\text{O}_v\text{-TiO}_2$  ( $\text{O}_{\text{sat}}\text{-TiO}_2$ ) samples with corresponding photos (b-d), respectively.

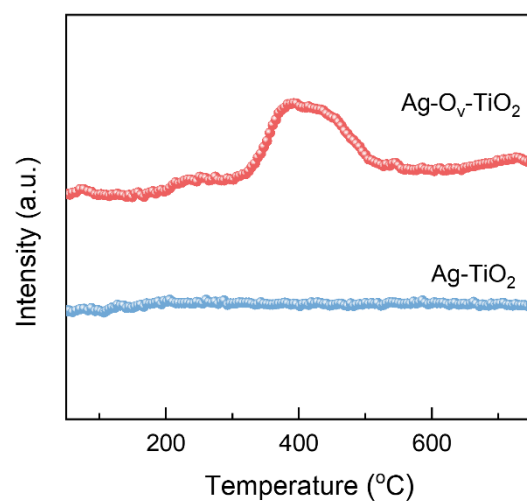

**Fig. S6** CO<sub>2</sub>-TPD profiles of Ag-TiO<sub>2</sub> and Ag-O<sub>v</sub>-TiO<sub>2</sub> catalysts.

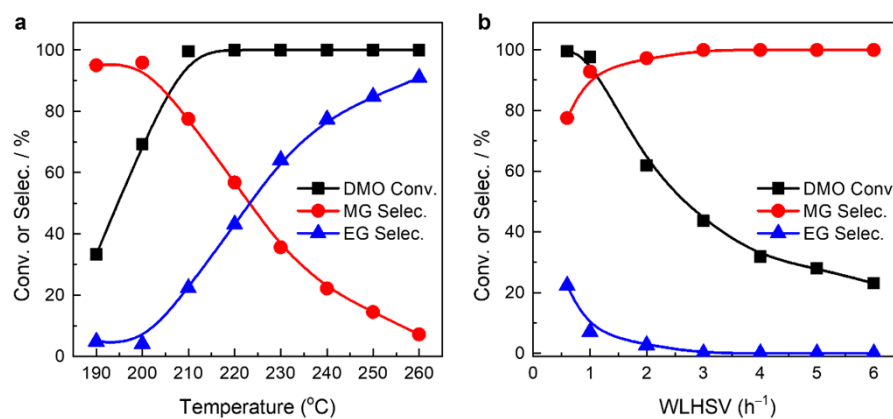

**Fig. S7** Effect of reaction temperature and  $WLHSV_{DMO}$  on catalytic performance with respect to Ag-O<sub>v</sub>-TiO<sub>2</sub> catalyst.

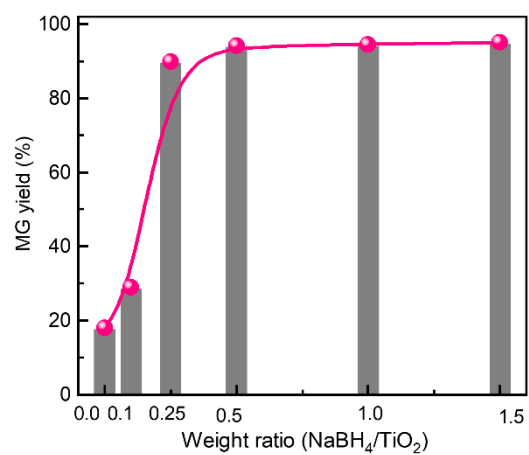

**Fig. S8** MG yields of various Ag-O<sub>v</sub>-TiO<sub>2</sub> catalysts obtained from distinct NaBH<sub>4</sub>/TiO<sub>2</sub> weight ratio.



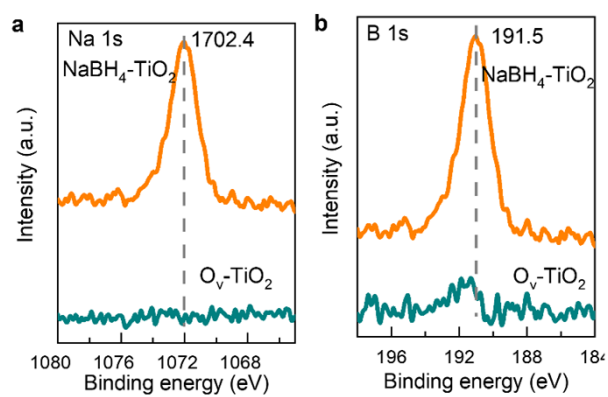

**Fig. S9** XPS characteristics of B 1s (a) and Na 1s (b) illustrating the residual B and/or Na in  $\text{O}_v\text{-TiO}_2$  nanocrystals, in comparison to the reference  $\text{NaBH}_4$ .

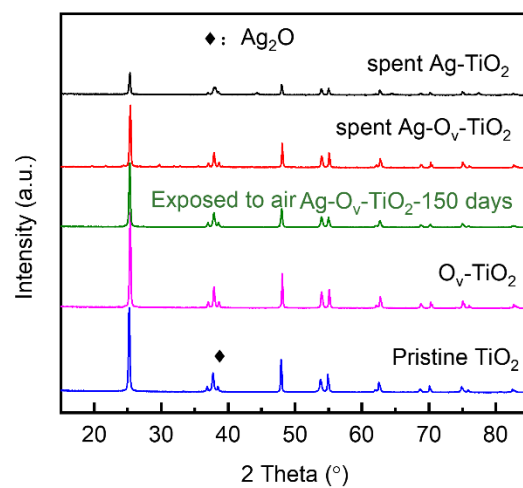

**Fig. S10** XRD patterns of spent Ag-(O<sub>v</sub>)-TiO<sub>2</sub> catalysts coupled with Ag-O<sub>v</sub>-TiO<sub>2</sub> catalyst exposed to air for 150 days.

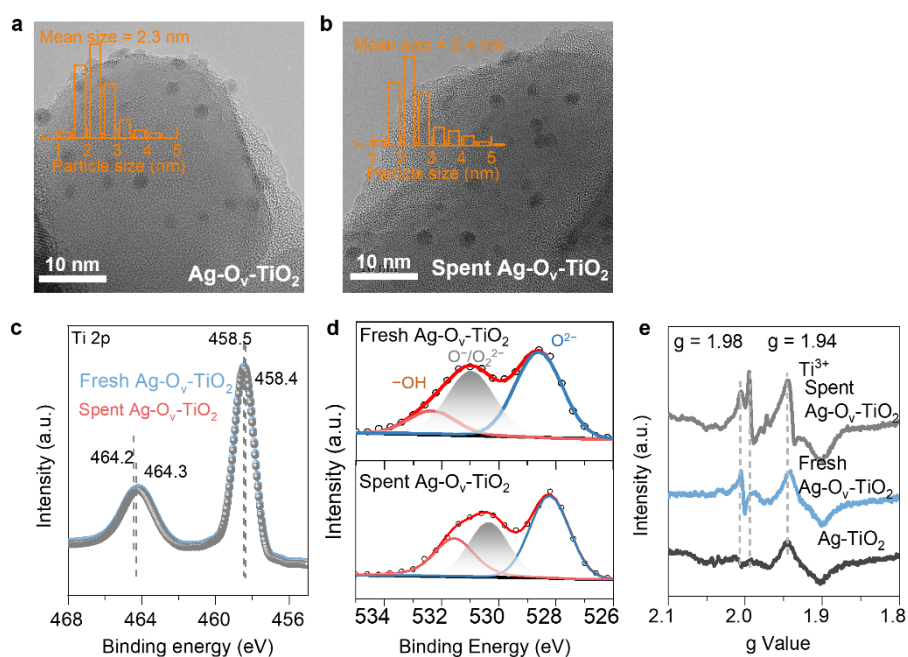

**Fig. S11** HRTEM images of fresh (a) and spent (b) Ag-O<sub>v</sub>-TiO<sub>2</sub> catalysts. (c) and (d) present XPS spectra of Ti 2p and deconvoluted O 1s, indicating the variation and stability of oxygen vacancies on fresh and spent Ag-O<sub>v</sub>-TiO<sub>2</sub> catalysts, respectively. (e) ESR signals of fresh and spent Ag-O<sub>v</sub>-TiO<sub>2</sub> catalysts.

**Table S1** Structural properties of Ag-based catalysts with different TiO<sub>2</sub> crystalline forms.

| Catalyst                            | BET surface area<br>(m <sup>2</sup> g <sup>-1</sup> ) | Pore volume<br>(cm <sup>3</sup> g <sup>-1</sup> ) | Pore diameter<br>(nm) |
|-------------------------------------|-------------------------------------------------------|---------------------------------------------------|-----------------------|
| Anatase TiO <sub>2</sub>            | 48.2                                                  | 0.43                                              | 26.5                  |
| O <sub>v</sub> -TiO <sub>2</sub>    | 54.6                                                  | 0.46                                              | 22.8                  |
| Ag-TiO <sub>2</sub>                 | 36.3                                                  | 0.14                                              | 16.2                  |
| Ag-O <sub>v</sub> -TiO <sub>2</sub> | 42.7                                                  | 0.21                                              | 19.8                  |

**Table S2** CO and H<sub>2</sub> chemisorption uptake of TiO<sub>2</sub>- and Ag-based catalysts, determined from chemisorption.

| Sample                              | CO uptake<br>( $\mu\text{mol g}_{\text{cat}}^{-1}$ ) | H <sub>2</sub> uptake<br>( $\mu\text{mol g}_{\text{cat}}^{-1}$ ) |
|-------------------------------------|------------------------------------------------------|------------------------------------------------------------------|
| Anatase TiO <sub>2</sub>            | 0.08                                                 | 0.03                                                             |
| O <sub>v</sub> -TiO <sub>2</sub>    | 0.7                                                  | 0.6                                                              |
| Ag-TiO <sub>2</sub>                 | 3.4                                                  | 0.8                                                              |
| Ag-O <sub>v</sub> -TiO <sub>2</sub> | 9.8                                                  | 3.6                                                              |

**Table S3** Curve fitting analysis results of Ag K-edge EXAFS of Ag-TiO<sub>2</sub> and Ag-O<sub>v</sub>-TiO<sub>2</sub> and Ag foil.

| Sample                              | Shell | N <sup>a</sup> | R <sup>b</sup> / Å | E <sup>c</sup> / eV | σ <sup>d</sup> / Å | R <sub>f</sub> <sup>d</sup> |
|-------------------------------------|-------|----------------|--------------------|---------------------|--------------------|-----------------------------|
| Ag foil                             | Ag–Ag | 12             | 2.86               | 2.8                 | 0.009              | 0.042                       |
| Ag-TiO <sub>2</sub>                 | Ag–O  | 2.8±0.1        | 2.28               | 1.5                 | 0.024              | 0.012                       |
|                                     | Ag–Ag | 8.9±0.1        | 2.89               | 4.1                 | 0.083              |                             |
| Ag-O <sub>v</sub> -TiO <sub>2</sub> | Ag–O  | 3.6±0.1        | 2.26               | 3.6                 | 0.081              | 0.006                       |
|                                     | Ag–Ag | 9.2±0.1        | 2.85               | 2.8                 | 0.082              | 0.004                       |

<sup>a</sup> Coordination number.

<sup>b</sup> Bond distance between absorber and backscatter atoms.

<sup>c</sup> Inner potential correction to account for the difference in the inner potential between the sample and the reference compound.

<sup>d</sup> Debye–Waller factor.

<sup>e</sup> Residual factor.

**Table S4.** Comparison studies on catalytic performance toward DMO selective hydrogenation to MG over Ag- and Au-based catalysts

| Catalyst               | Tem.<br>(°C) | H <sub>2</sub> /DMO<br>(mol·mol) | WHSV <sub>DMO</sub><br>(g·g <sub>cat</sub> <sup>-1</sup> ·h <sup>-1</sup> ) | Con. <sub>DMO</sub><br>(%) | Sel. <sub>M</sub><br>(%) | STY <sub>MG</sub><br>(g <sub>MG</sub> ·g <sub>cat</sub> <sup>-1</sup> ·h <sup>-1</sup> ) | TOF<br>(h <sup>-1</sup> ) | Lifetime<br>(h) | Reference |
|------------------------|--------------|----------------------------------|-----------------------------------------------------------------------------|----------------------------|--------------------------|------------------------------------------------------------------------------------------|---------------------------|-----------------|-----------|
| 10Ag/SiO <sub>2</sub>  | 180          | 150                              | 0.5                                                                         | 54.4                       | 99.8                     | 0.21                                                                                     | 18.3                      | 264             | 7         |
| Ag/MCM-41              | 200          | 100                              | 0.2                                                                         | 99.8                       | 96.2                     | 0.15                                                                                     | –                         | –               | 8         |
| 15Ag/KCC-1             | 220          | 100                              | 1.2                                                                         | 97.8                       | 92.2                     | 0.82                                                                                     | 17.6                      | 110             | 9         |
| 4.5Ag/SBA-15           | 235          | 100                              | 0.6                                                                         | 99.9                       | 95.6                     | 0.44                                                                                     | 19.2                      | –               | 10        |
| Ag-in/hCNT             | 220          | 80                               | 0.6                                                                         | 100.0                      | 97.0                     | 0.44                                                                                     | 23.6                      | 200             | 11        |
| 15Ag/SiO <sub>2</sub>  | 220          | 100                              | 0.2                                                                         | 100.0                      | 92.0                     | 0.14                                                                                     | 12.1                      | 120             | 12        |
| 15Ag/KCC-1             | 220          | 100                              | 1.2                                                                         | 97.8                       | 92.2                     | 0.82                                                                                     | 17.6                      | 110             | 9         |
| Au/Fe/ZrO <sub>2</sub> | 210          | 200                              | 0.257                                                                       | 60.0                       | 88.0                     | 0.10                                                                                     | 11.4                      | 300□            | 13        |
| Ag/AC-N-3              | 220          | 80                               | 0.6                                                                         | 99.8                       | 95.0                     | 0.43                                                                                     | –                         | 150             | 14        |
| 10Ag/0.02Ti-KCC-1      | 225          | 100                              | 1.0                                                                         | 98.0                       | 95.0                     | 0.73                                                                                     | 15.7                      | 100             | 15        |

|                                                    |     |     |      |      |      |      |       |      |                  |
|----------------------------------------------------|-----|-----|------|------|------|------|-------|------|------------------|
| Ag-B <sub>2</sub> O <sub>3</sub> /SiO <sub>2</sub> | 180 | 150 | 0.5  | 98.9 | 97.2 | 0.37 | –     | 264  | 7                |
| Ag/t-ZrO <sub>2</sub>                              | 205 | 100 | 1.2  | 60.6 | 97.0 | 0.36 | 21.6  | 100  | 16               |
| 5Ag <sub>1</sub> -Ni <sub>0.20</sub> /SBA-15       | 200 | 80  | 1.0  | 97.6 | 92.8 | 0.69 | –     | 140  | 17               |
| 8Au-1.5Ag/SBA-15                                   | 145 | 100 | 0.6  | 99.5 | 94.2 | 0.43 | –     | 200  | 10               |
| 8Au/SBA-15                                         | 235 | 100 | 0.6  | 65.9 | 99.9 | 0.30 | –     | 100  | 10               |
| 0.4Ag-28CuO <sub>x</sub> /Ni-foam                  | 210 | 300 | 0.25 | 96.1 | 96.1 | 0.18 | –     | 200  | 18               |
| Ag-O <sub>v</sub> -TiO <sub>2</sub>                | 220 | 80  | 1.8  | 99.8 | 99.4 | 0.85 | 105.4 | 1000 | <b>This work</b> |



## References

1. Q. Kang, J. Cao, Y. Zhang, L. Liu, H. Xu and J. Ye, *Journal of Materials Chemistry A*, 2013, **1**, 5766-5774.
2. Z. Xiu, Z. Xing, Z. Li, X. Wu, X. Yan, M. Hu, Y. Cao, S. Yang and W. Zhou, *Materials Research Bulletin*, 2018, **100**, 191-197.
3. J. Zhang, X. Wu, W.-C. Cheong, W. Chen, R. Lin, J. Li, L. Zheng, W. Yan, L. Gu, C. Chen, Q. Peng, D. Wang and Y. Li, *Nature Communications*, 2018, **9**, 1002.
4. G. Ou, Y. Xu, B. Wen, R. Lin, B. Ge, Y. Tang, Y. Liang, C. Yang, K. Huang, D. Zu, R. Yu, W. Chen, J. Li, H. Wu, L.-M. Liu and Y. Li, *Nature Communications*, 2018, **9**, 1302.
5. Y. Huang, H. Ariga, X. Zheng, X. Duan, S. Takakusagi, K. Asakura and Y. Yuan, *Journal of Catalysis*, 2013, **307**, 74-83.
6. J. Zhou, X. Duan, L. Ye, J. Zheng, M. M.-J. Li, S. C. E. Tsang and Y. Yuan, *Applied Catalysis a-General*, 2015, **505**, 344-353.
7. P. Schlexer, H.-Y. T. Chen and G. Pacchioni, *Catalysis Letters*, 2017, **147**, 1871-1881.
8. A. Y. Yin, C. Wen, W. L. Dai and K. N. Fan, *Applied Catalysis B-Environmental*, 2011, **108**, 90-99.
9. M. Y. Ouyang, Y. Wang, J. Zhang, Y. J. Zhao, S. P. Wang and X. B. Ma, *Rsc Advances*, 2016, **6**, 12788-12791.
10. J. W. Zheng, H. Q. Lin, Y. N. Wang, X. L. Zheng, X. P. Duan and Y. Z. Yuan, *Journal of Catalysis*, 2013, **297**, 110-118.
11. J. W. Zheng, X. P. Duan, H. Q. Lin, Z. Q. Gu, H. H. Fang, J. H. Li and Y. Z. Yuan, *Nanoscale*, 2016, **8**, 5959-5967.
12. A. Yin, X. Guo, W. Dai and K. Fan, *Chemical Communications*, 2010, **46**, 4348-4350.
13. M. Abbas, J. Zhang and J. G. Chen, *Catalysis Science & Technology*, 2020, **10**, 1125-1134.
14. R. Wang, J. Wang, H. Zi, Y. Xia, H. Wang and X. Liu, *Molecular Catalysis*, 2017, **441**, 168-178.
15. M. Y. Ouyang, J. Wang, B. Peng, Y. J. Zhao, S. P. Wang and X. B. Ma, *Applied Surface Science*, 2019, **466**, 592-600.
16. J. Zou, X. Duan, X. Liu, L. Huang, X. Liu, J. Zuo, W. Jiao, H. Lin, L. Ye and Y. Yuan, *Chemical Engineering Journal*, 2023, **454**, 140110.
17. J. F. Zhou, X. P. Duan, L. M. Ye, J. W. Zheng, M. M. J. Li, S. C. E. Tsang and Y. Z. Yuan, *Applied Catalysis a-General*, 2015, **505**, 344-353.
18. Y. F. Chen, L. P. Han, J. Zhu, P. J. Chen, S. Y. Fan, G. F. Zhao, Y. Liu and Y. Lu, *Catalysis Communications*, 2017, **96**, 58-62.
